# Supplementary material for: Non-linear elastic properties of actin patches to partially rescue yeast endocytosis efficiency in the absence of the cross-linker Sac6
Source: Royal Society of Chemistry journal article supplement (doi:10.1039/d1sm01437d), 2022-01-01
Supplement: d1sm01437d1.pdf [file d1sm01437d1.pdf]

Supplementary figure

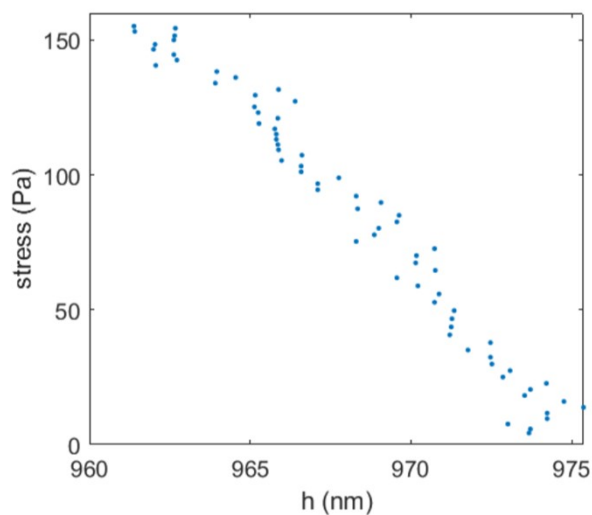

|      | K50 (kPa) |
|------|-----------|
| Exp1 | 8.4       |
| Exp2 | 7.3       |
| Exp3 | 7.7       |
| Exp4 | 9.7       |
| Exp5 | 5.4       |

*Left: Deformation as a function of applied stress of a reconstituted actin patch (from WT extract) which has grown under an applied stress of ~80 Pa. Right: Table of tangent modulus at 50 Pa of the patch on the left as well as four replicates on different patches grown under 80 Pa stress.*
